# Supplementary material
Source: PubMed Central journal article supplement (PMC6072486)

## Characterization Data:

### $^1\text{H}$ NMR, $^{13}\text{C}$ NMR and Mass spectrum

$^1\text{H}$  NMR OF 1

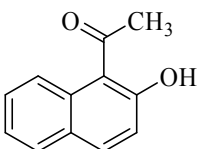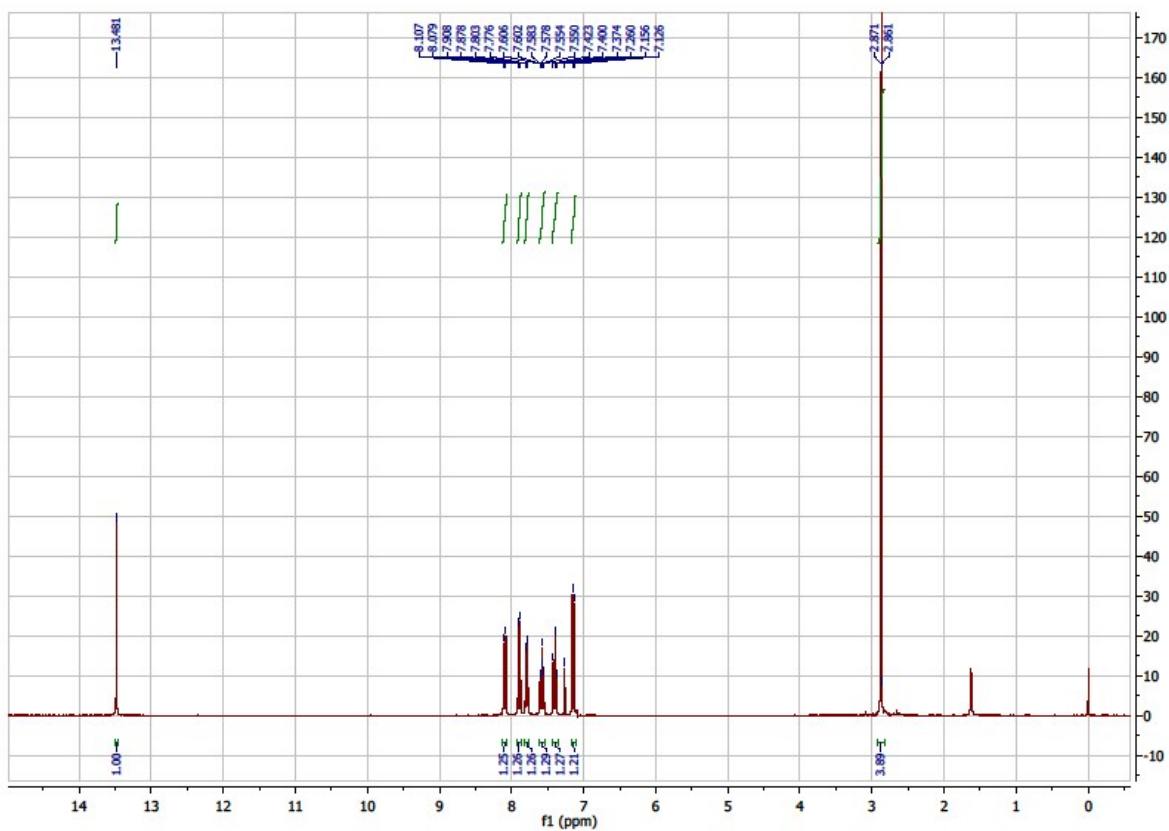

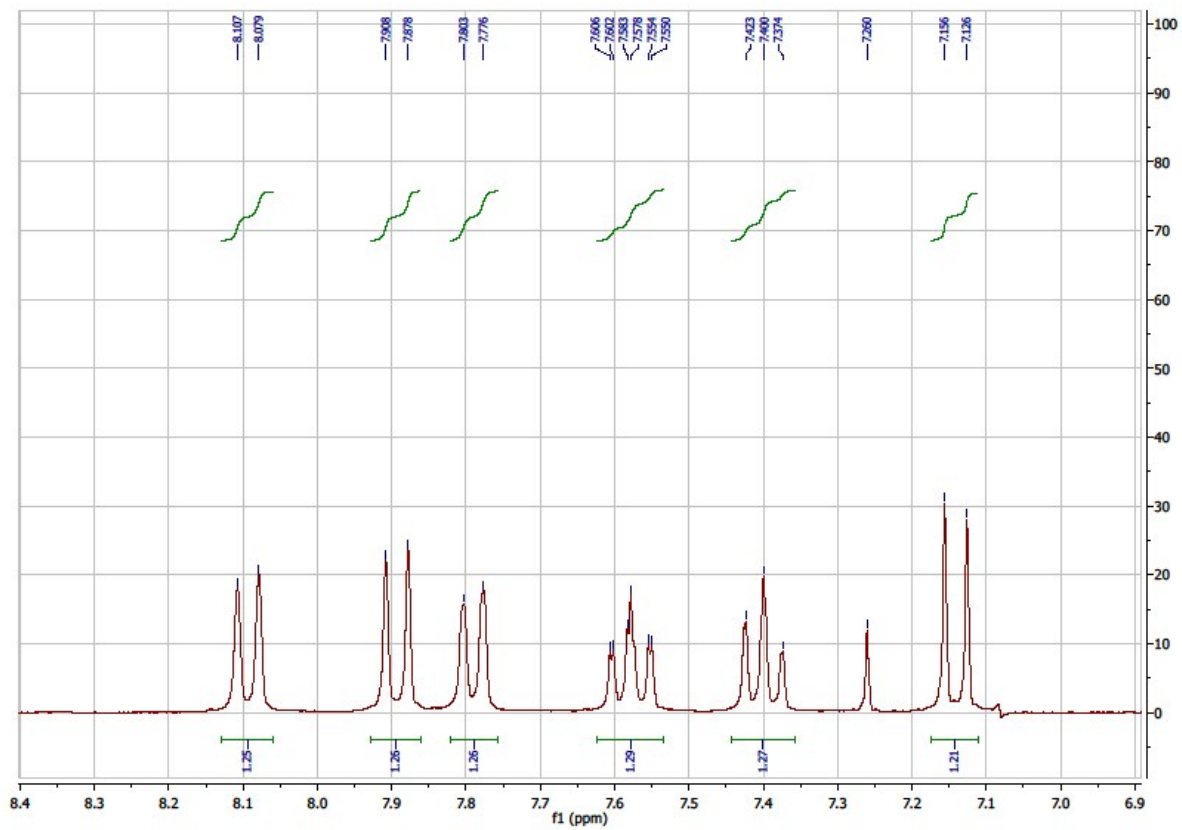

$^{13}\text{C}$  NMR OF 1

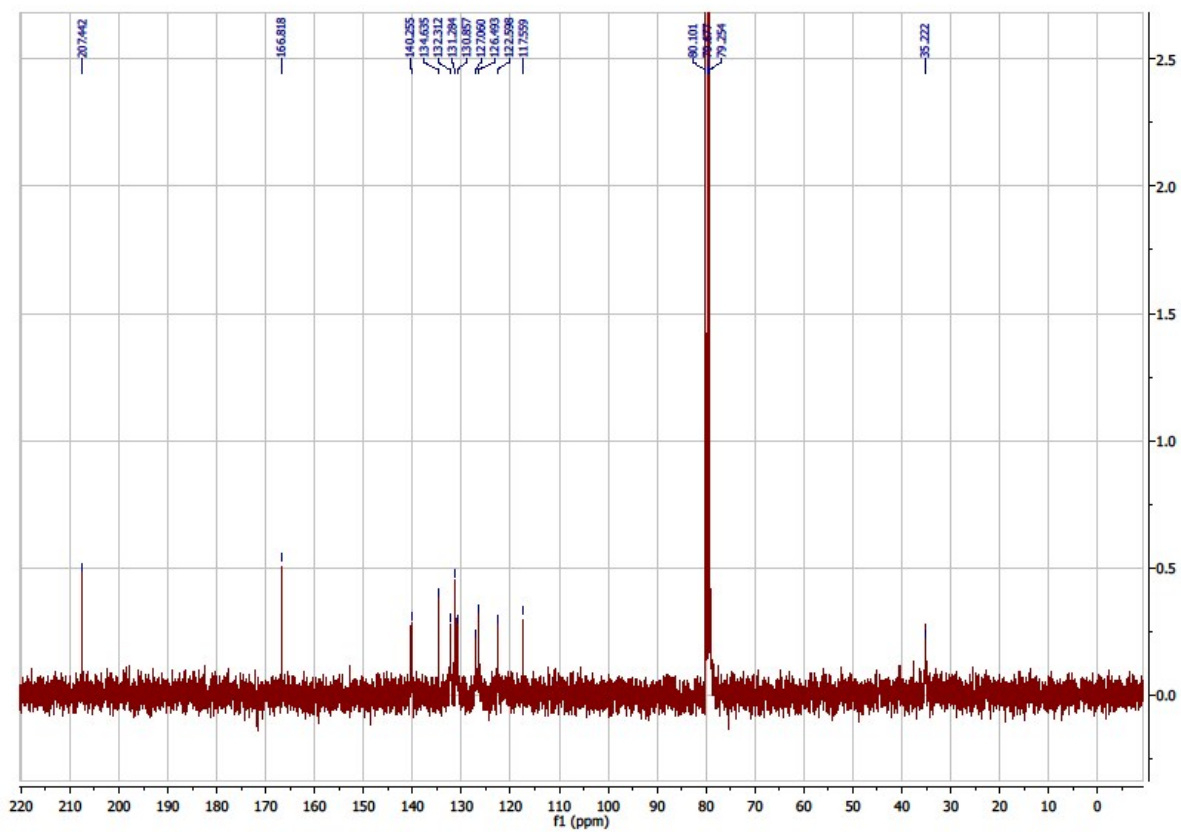

<sup>1</sup>H NMR OF 2

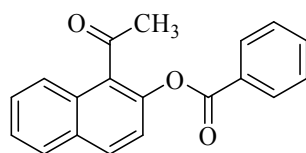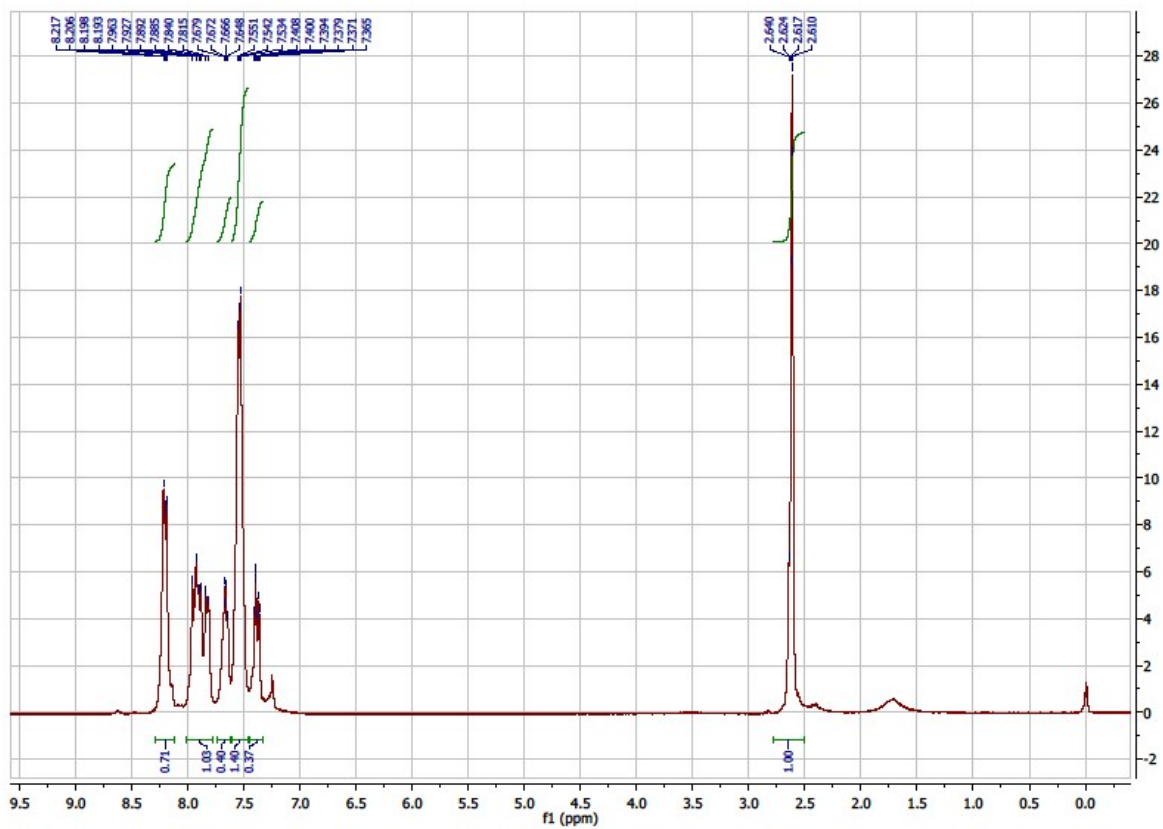

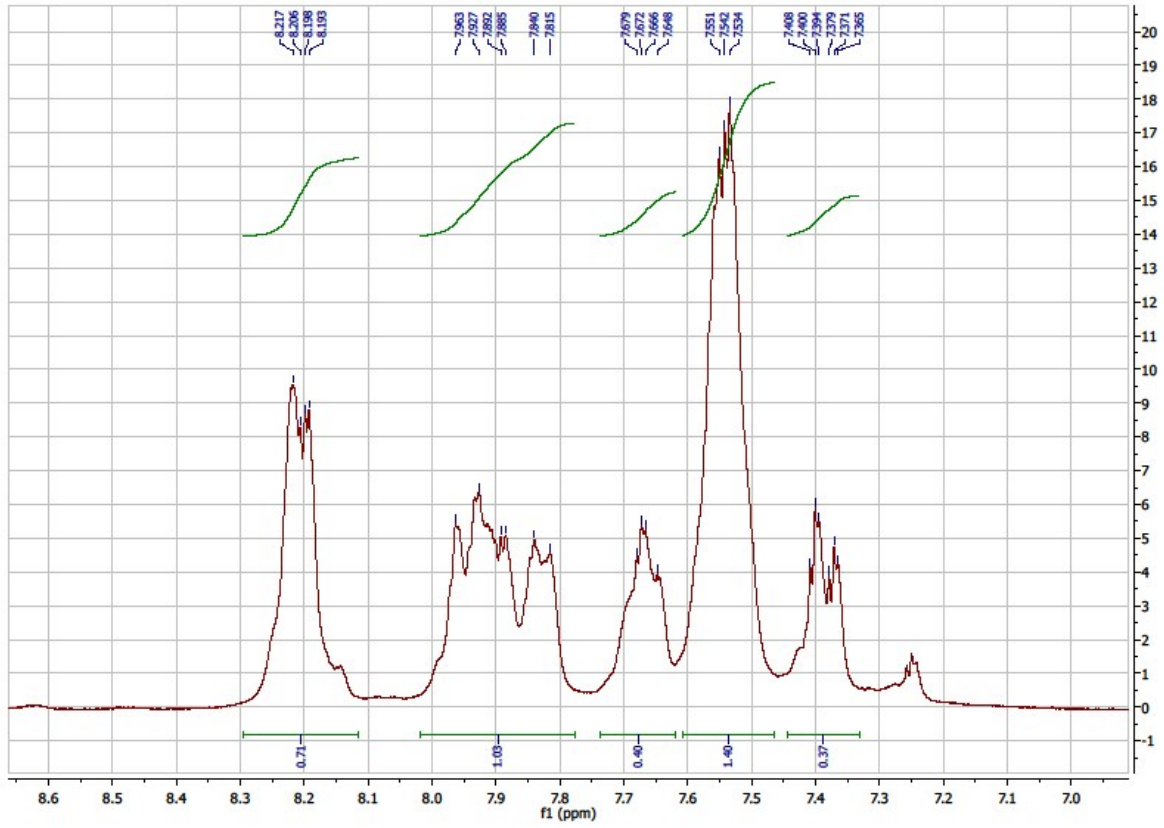

<sup>13</sup>C NMR OF 2

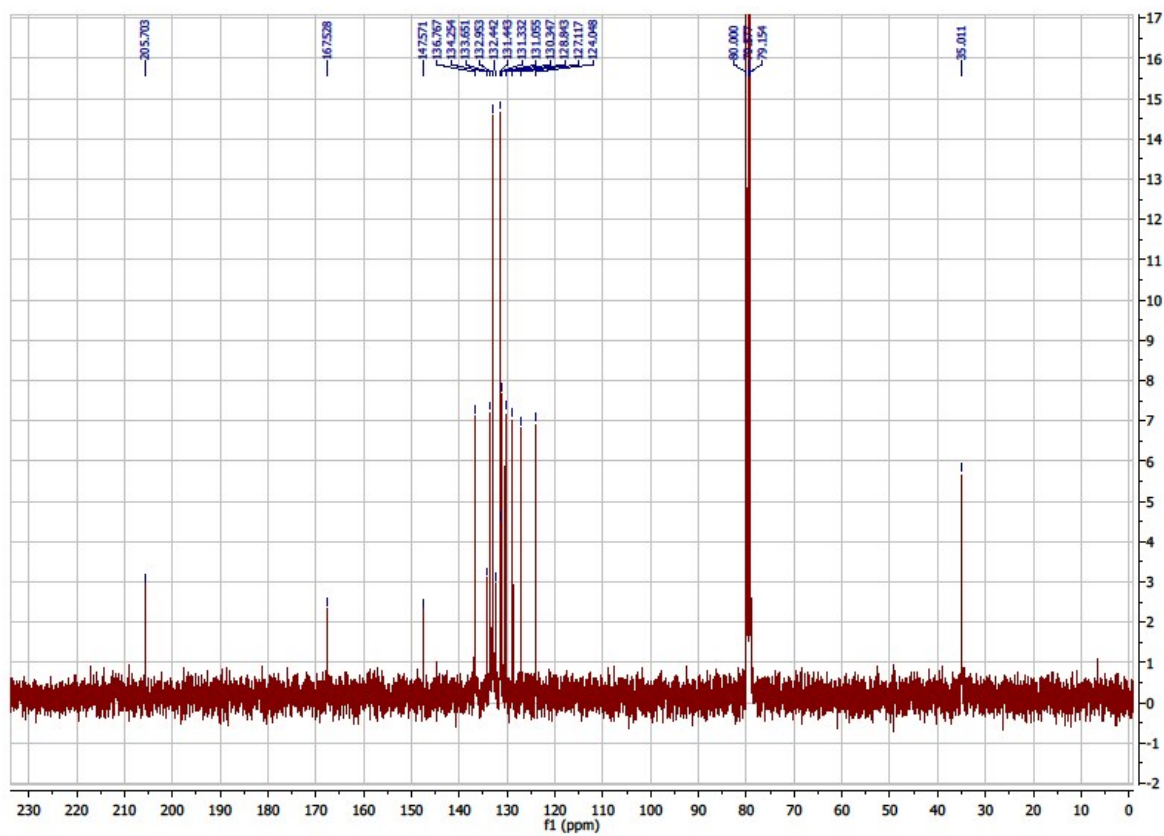

<sup>1</sup>H NMR OF B-7

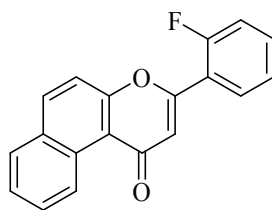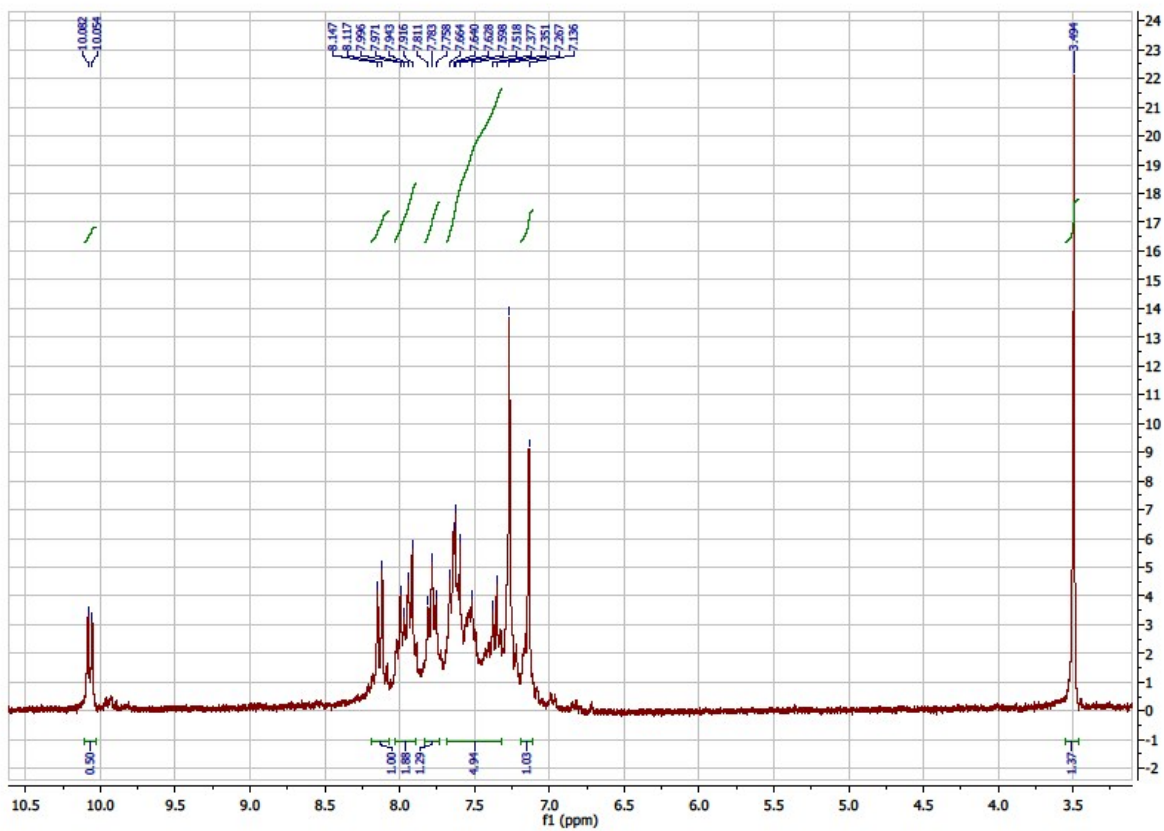

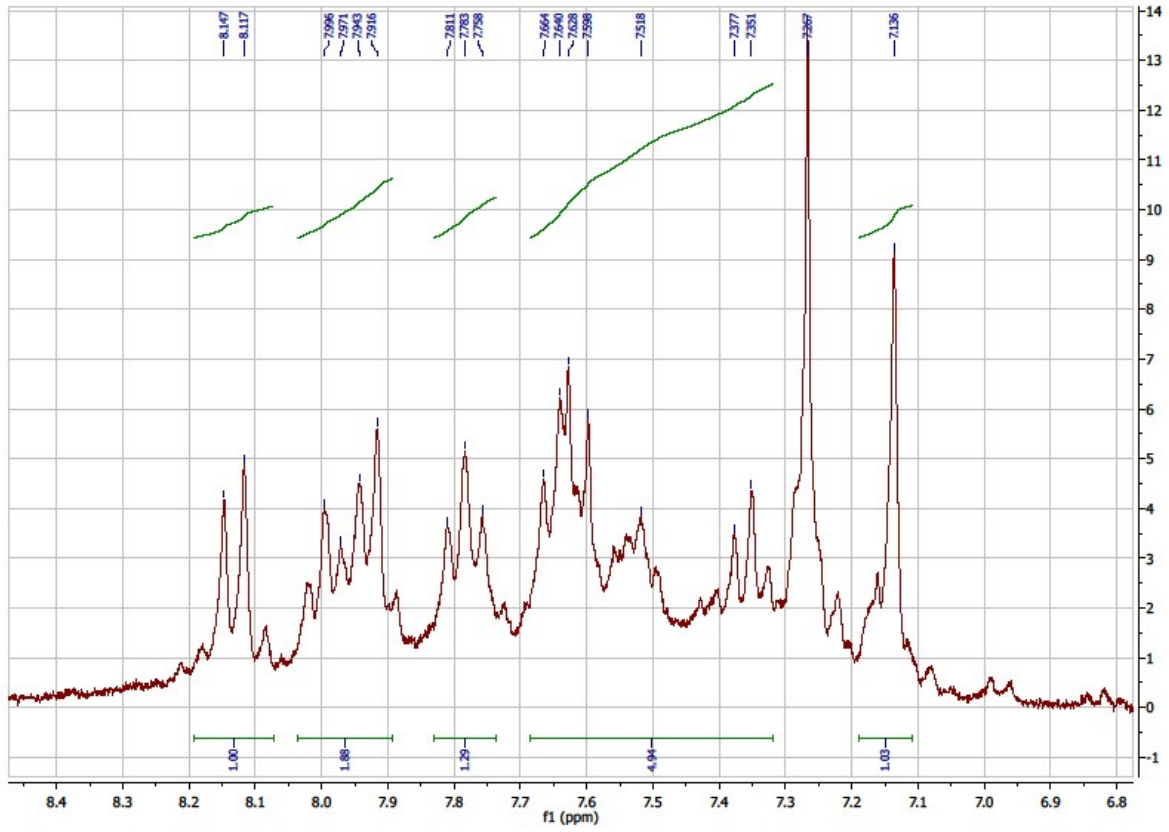



<sup>13</sup>C NMR OF B-7

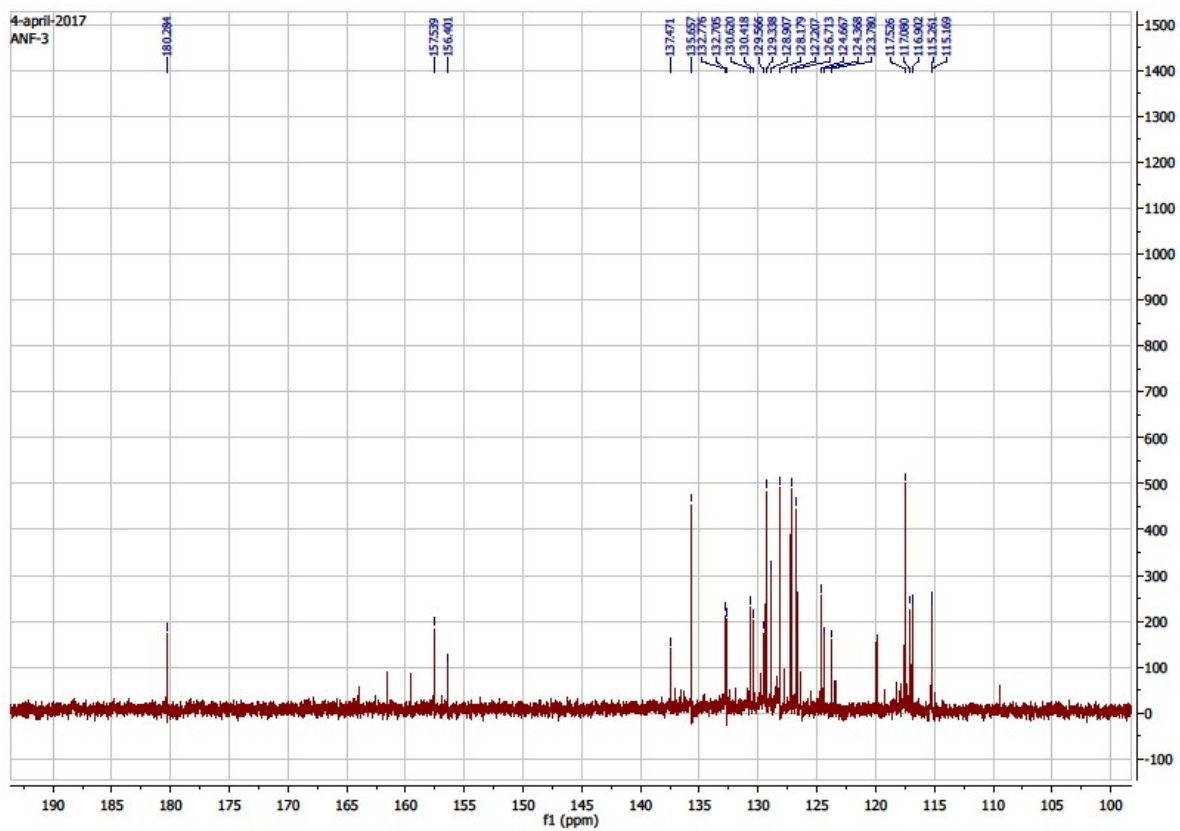

<sup>1</sup>H NMR OF B-12

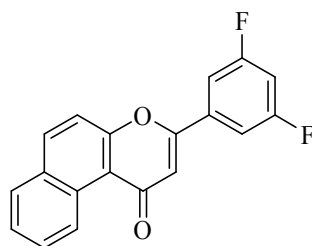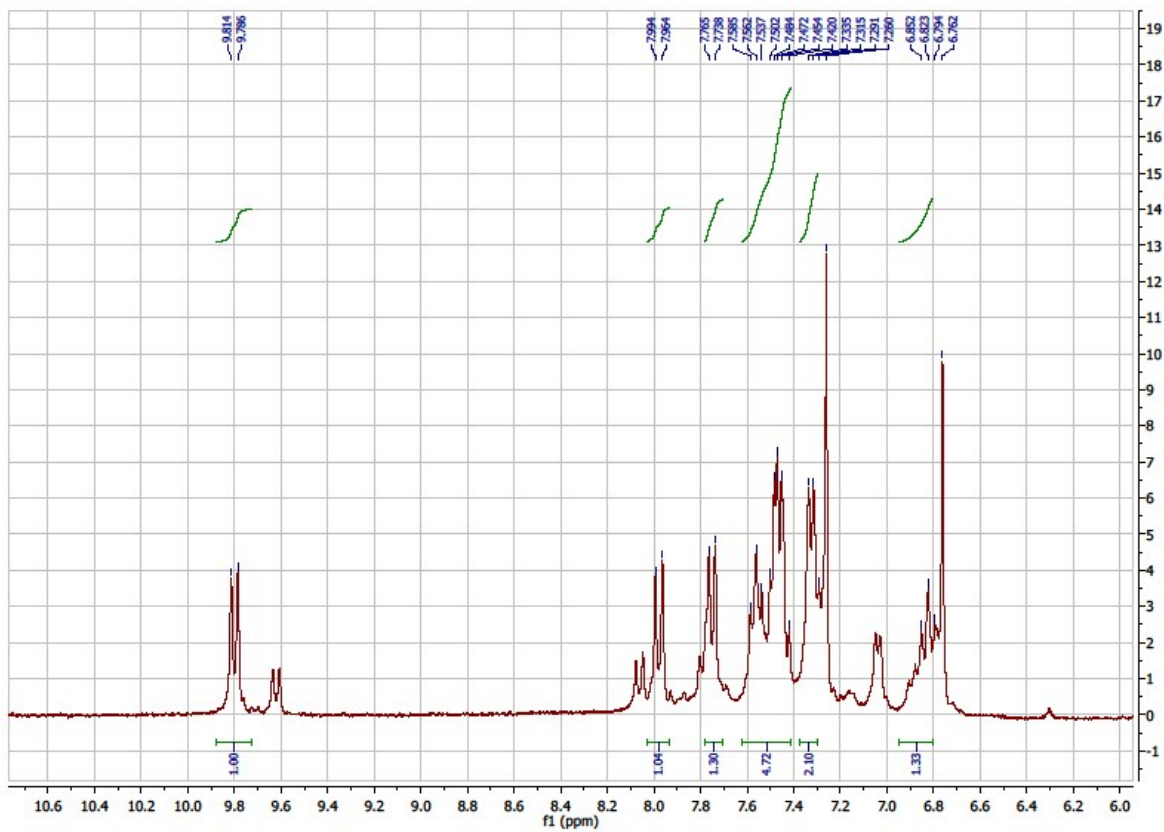

<sup>13</sup>C NMR OF B-12

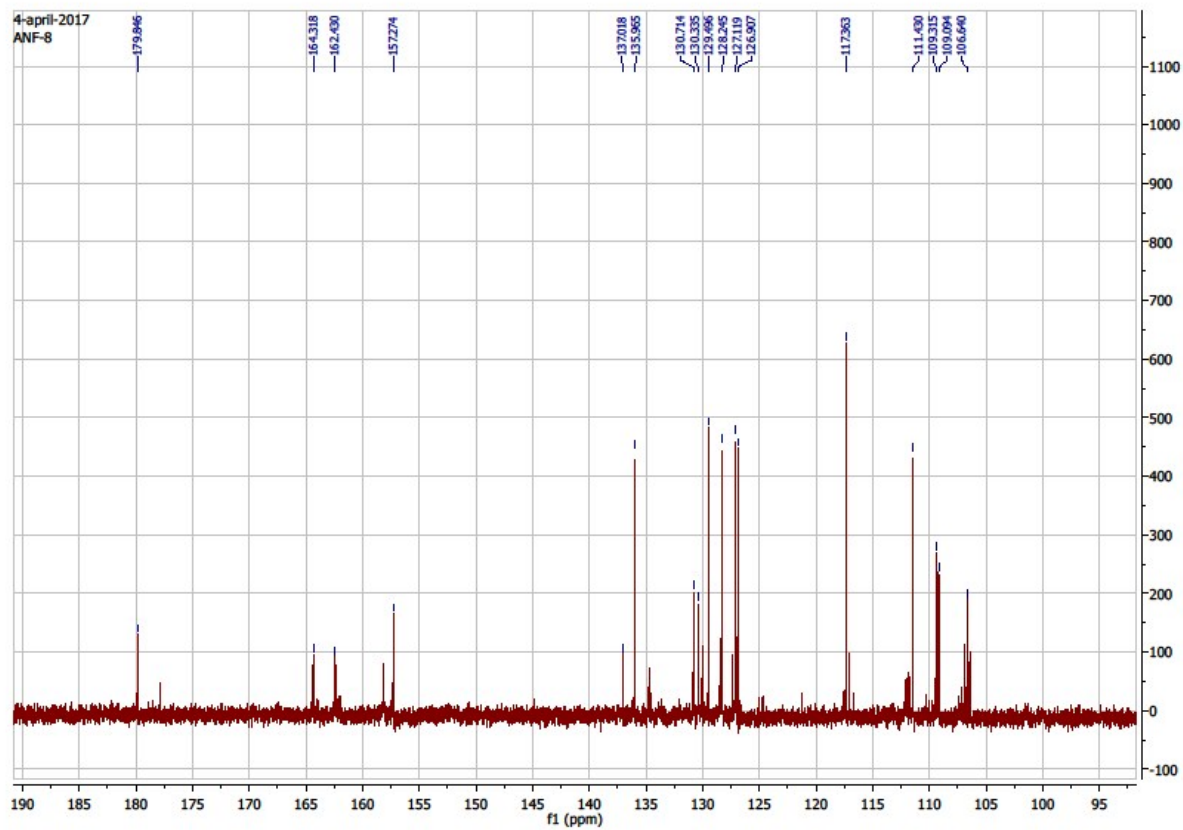

MASS SPECTRA OF B-12

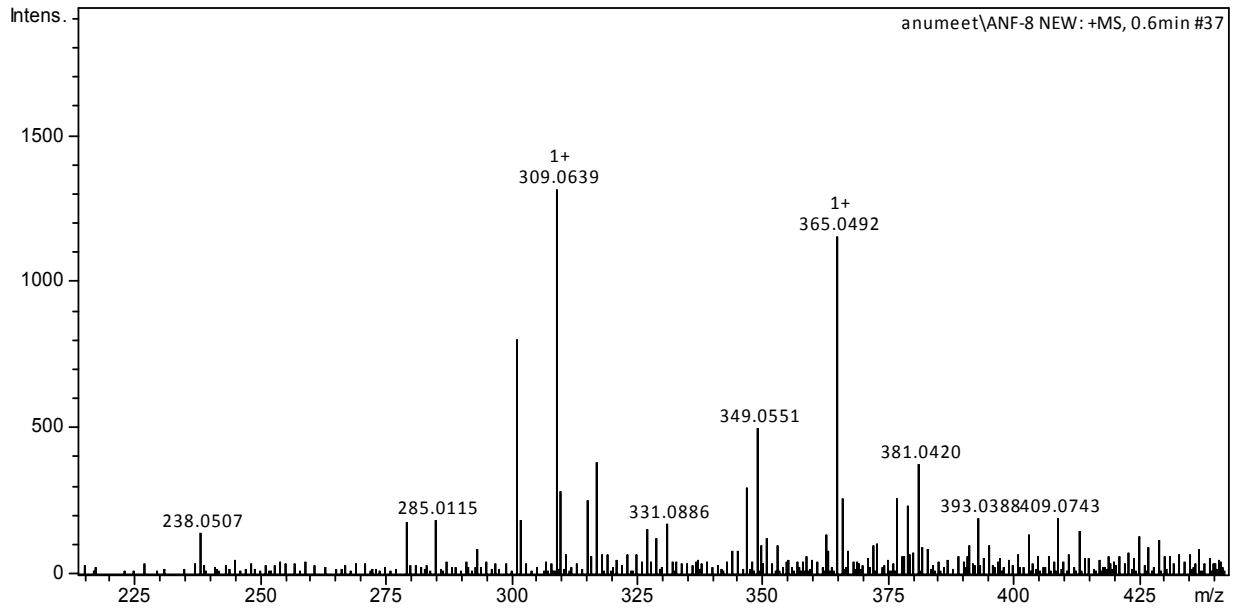

<sup>1</sup>H NMR OF B-16

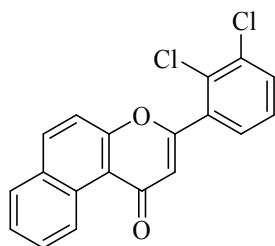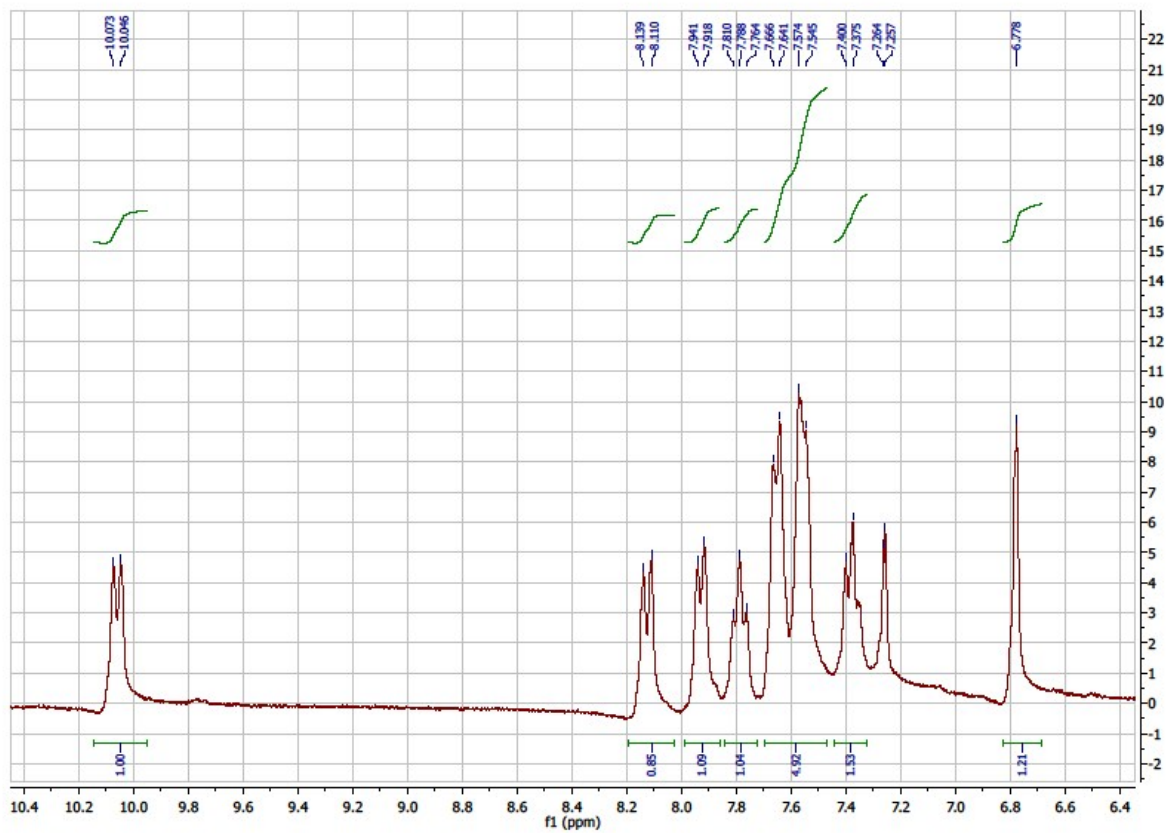

<sup>13</sup>C NMR OF B-16

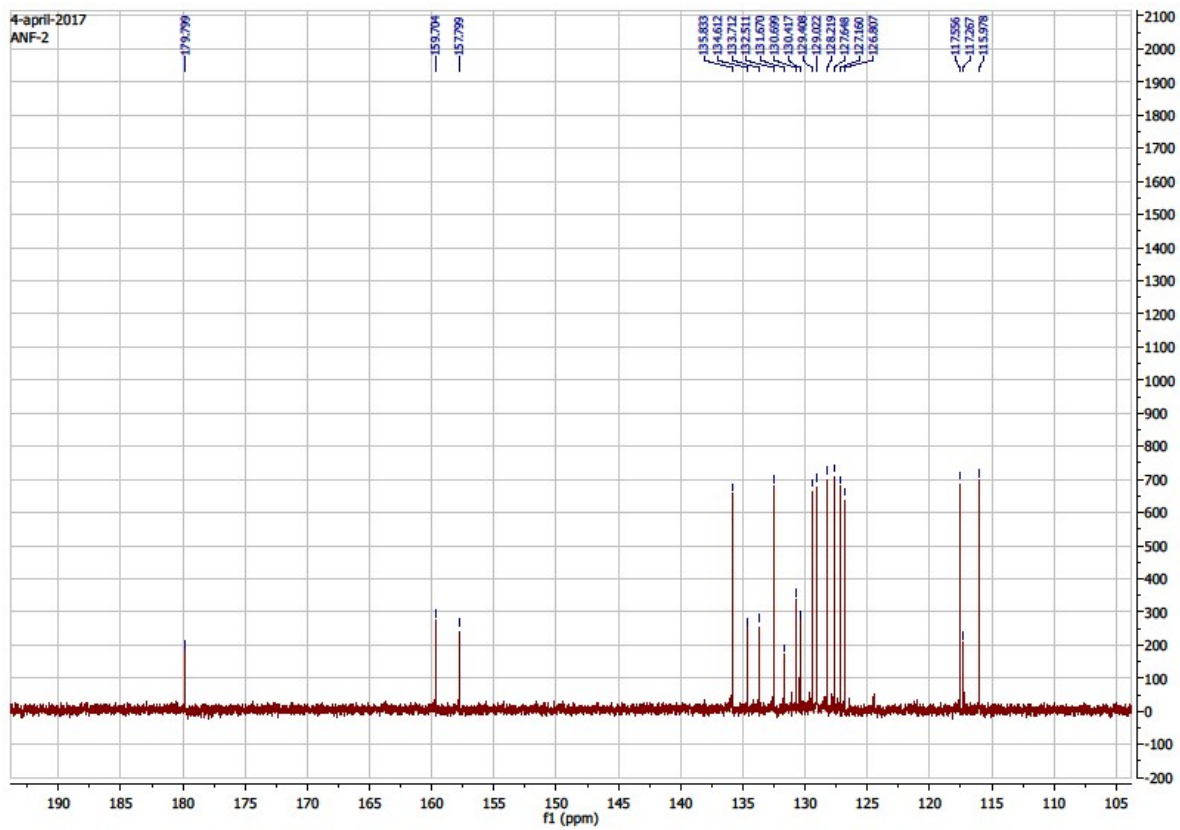

MASS SPECTRA OF B-16

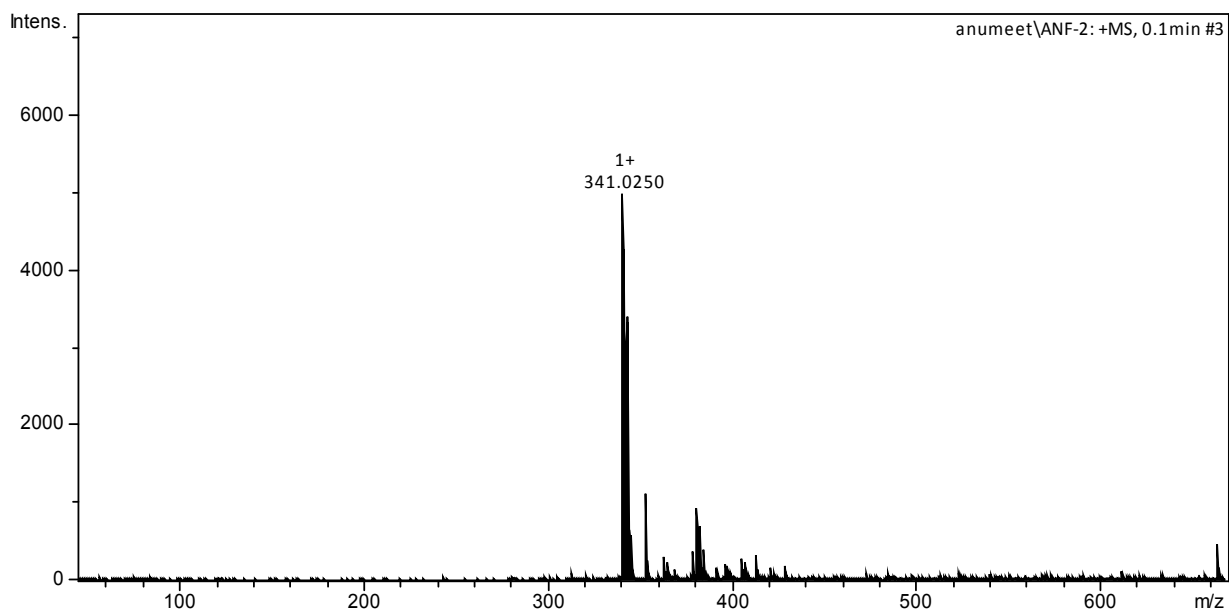

<sup>1</sup>H NMR OF B-17

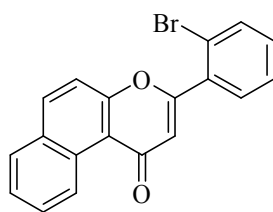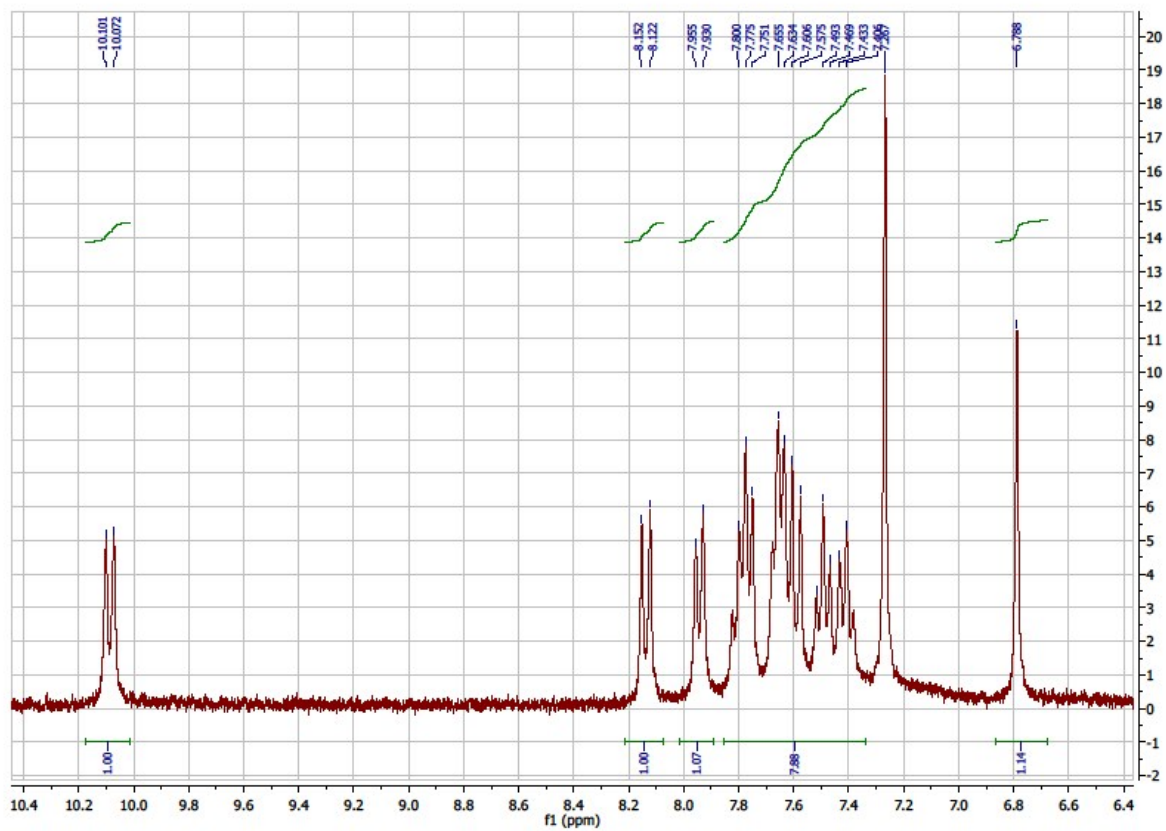



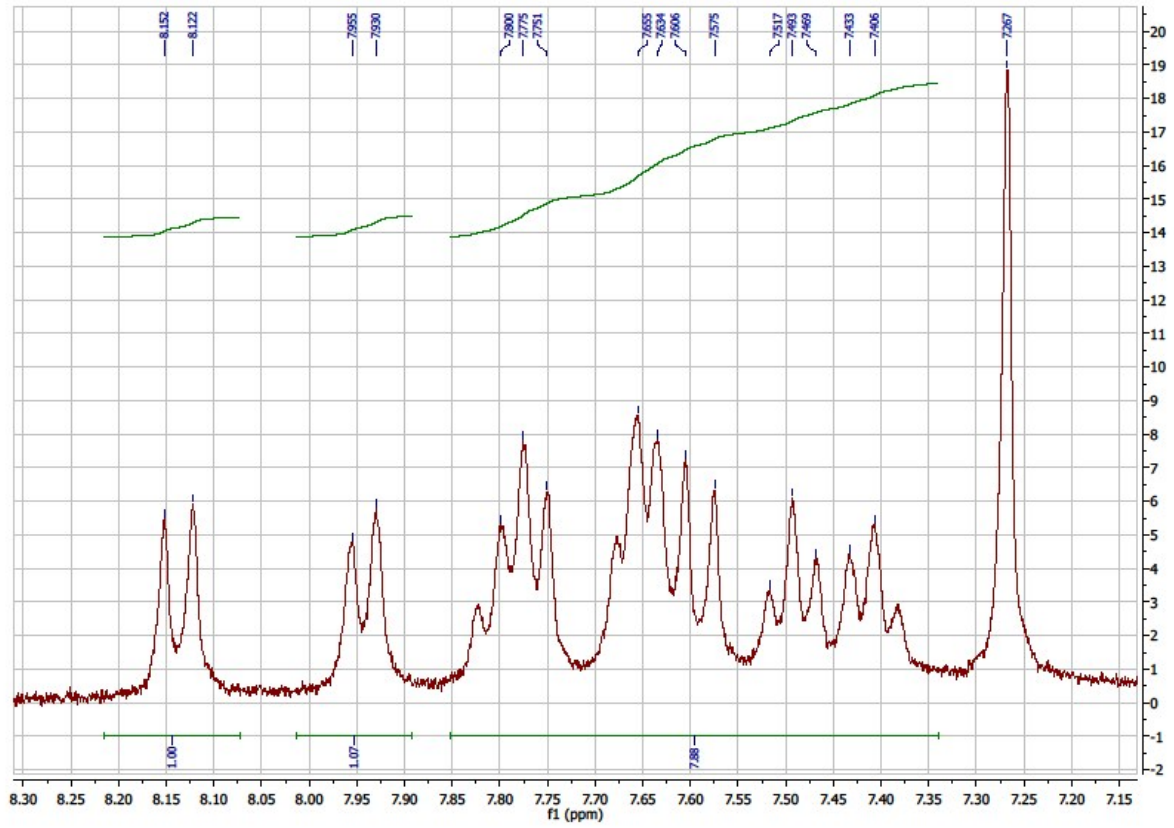

<sup>13</sup>C NMR OF B-17

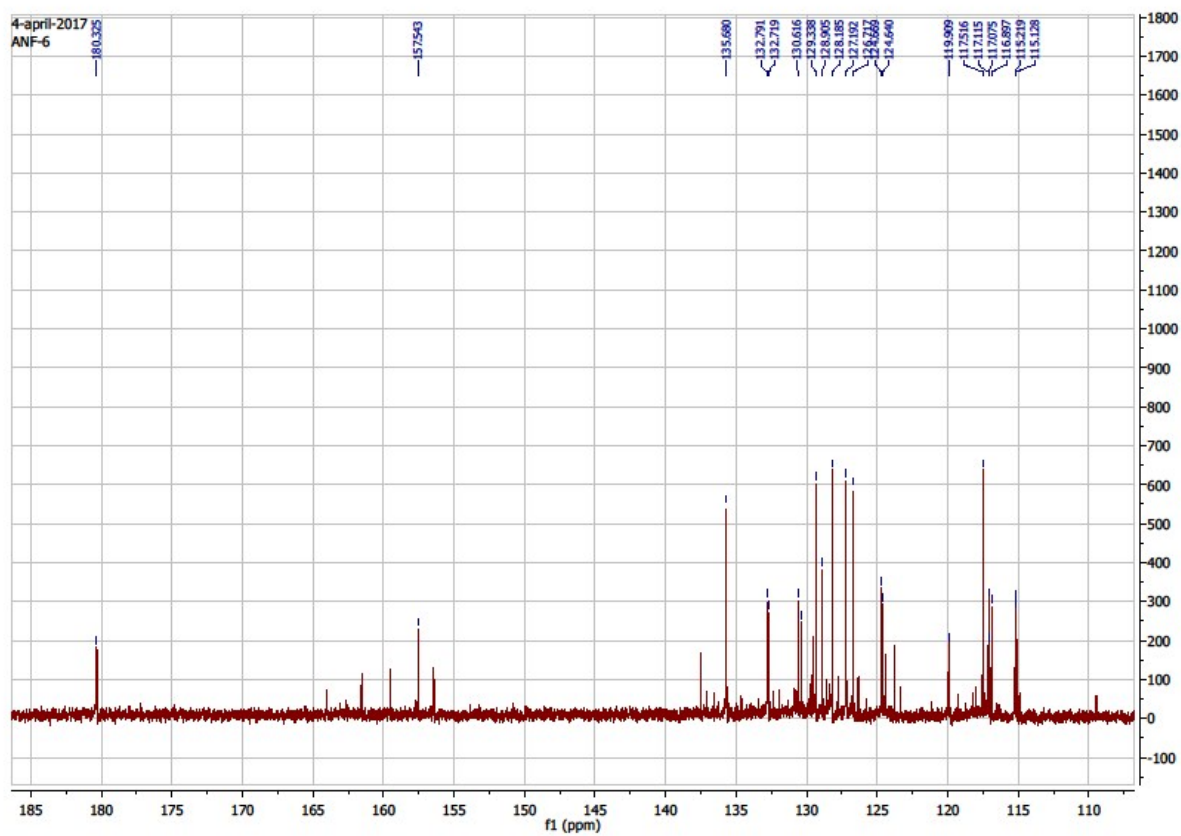

MASS SPECTRA OF B-17

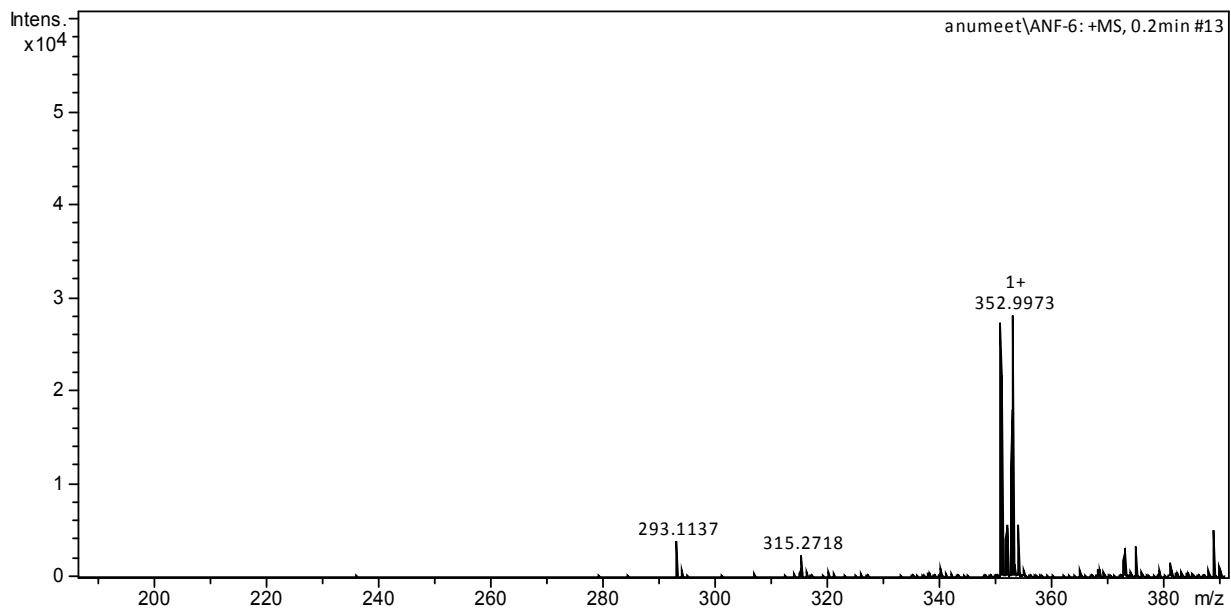

<sup>1</sup>H NMR OF B-19

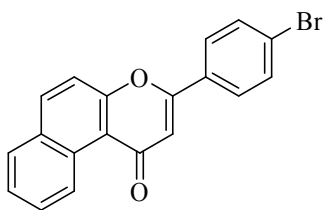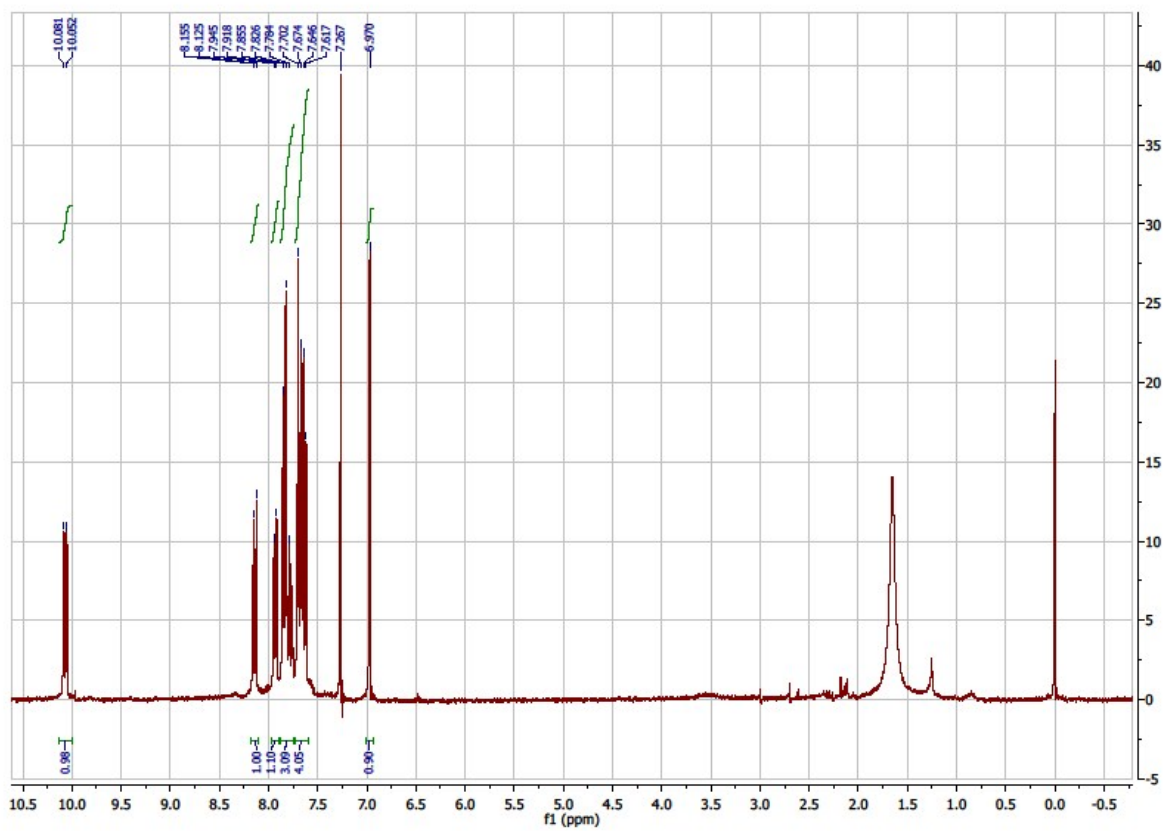

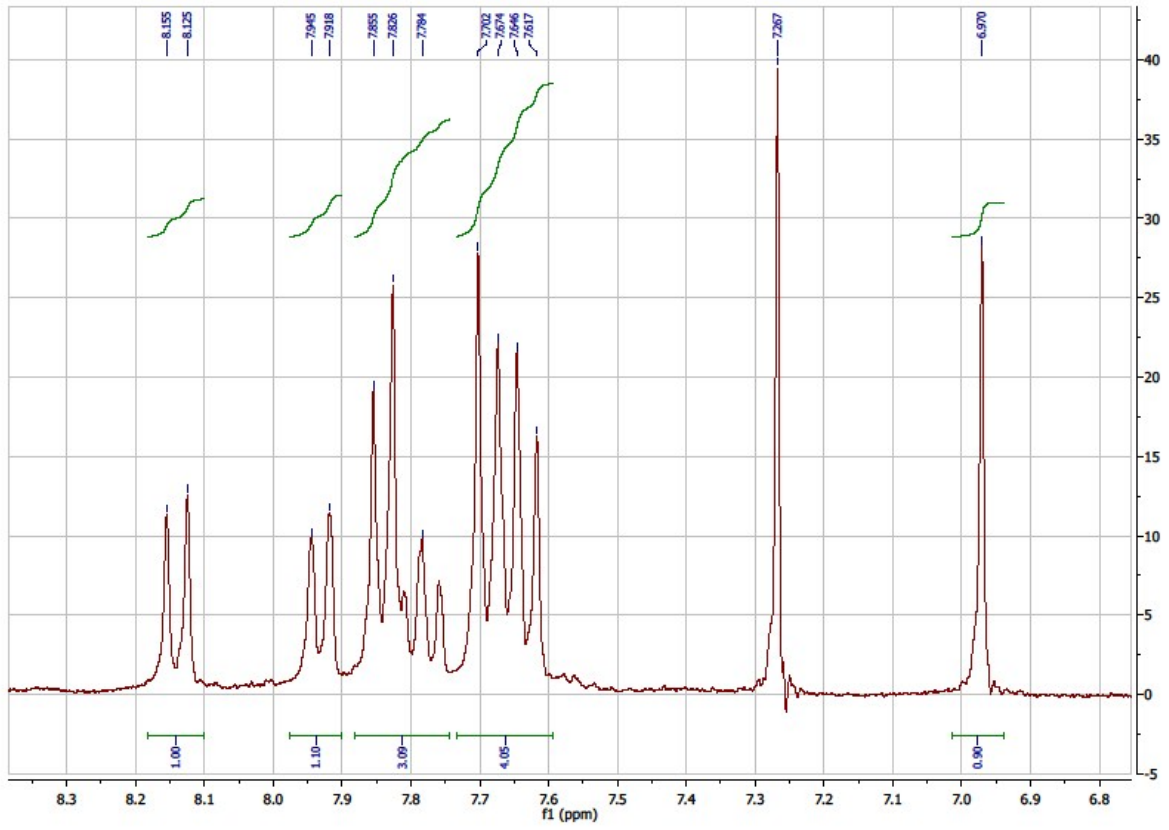

<sup>13</sup>C NMR OF B-19

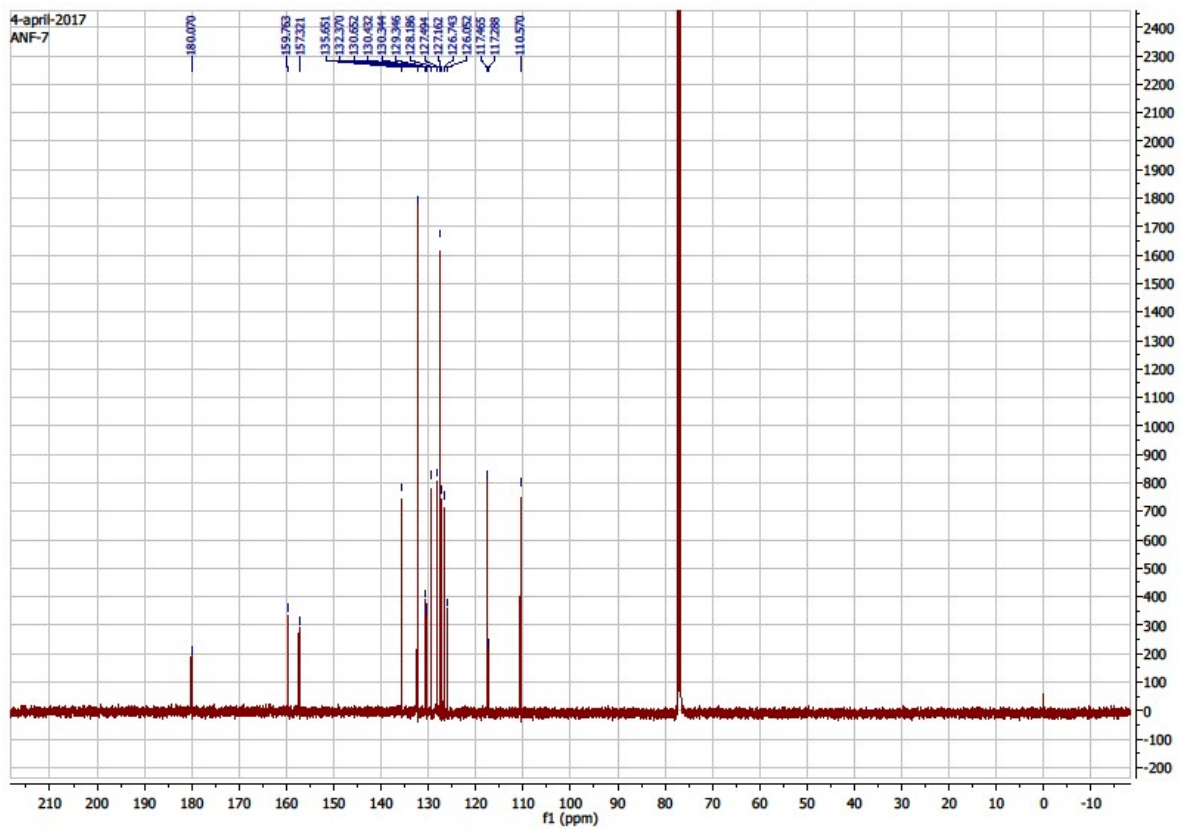

MASS SPECTRA OF B-19

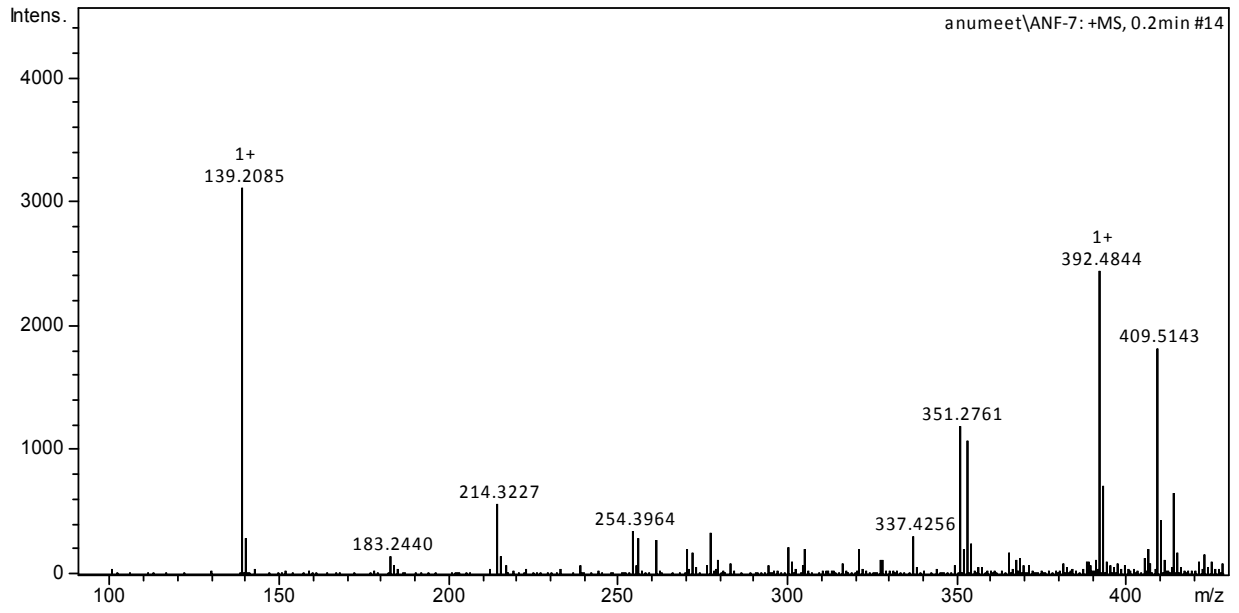

<sup>1</sup>H NMR OF B-23

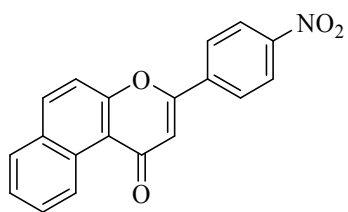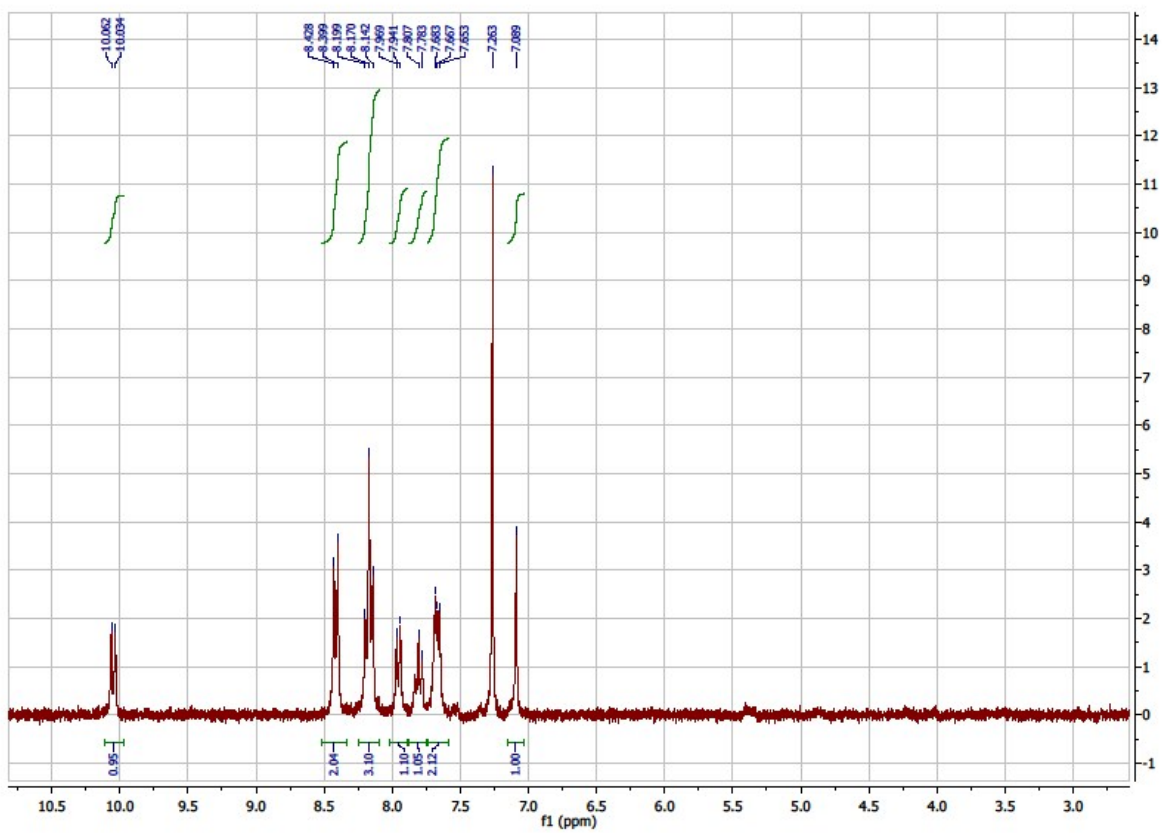



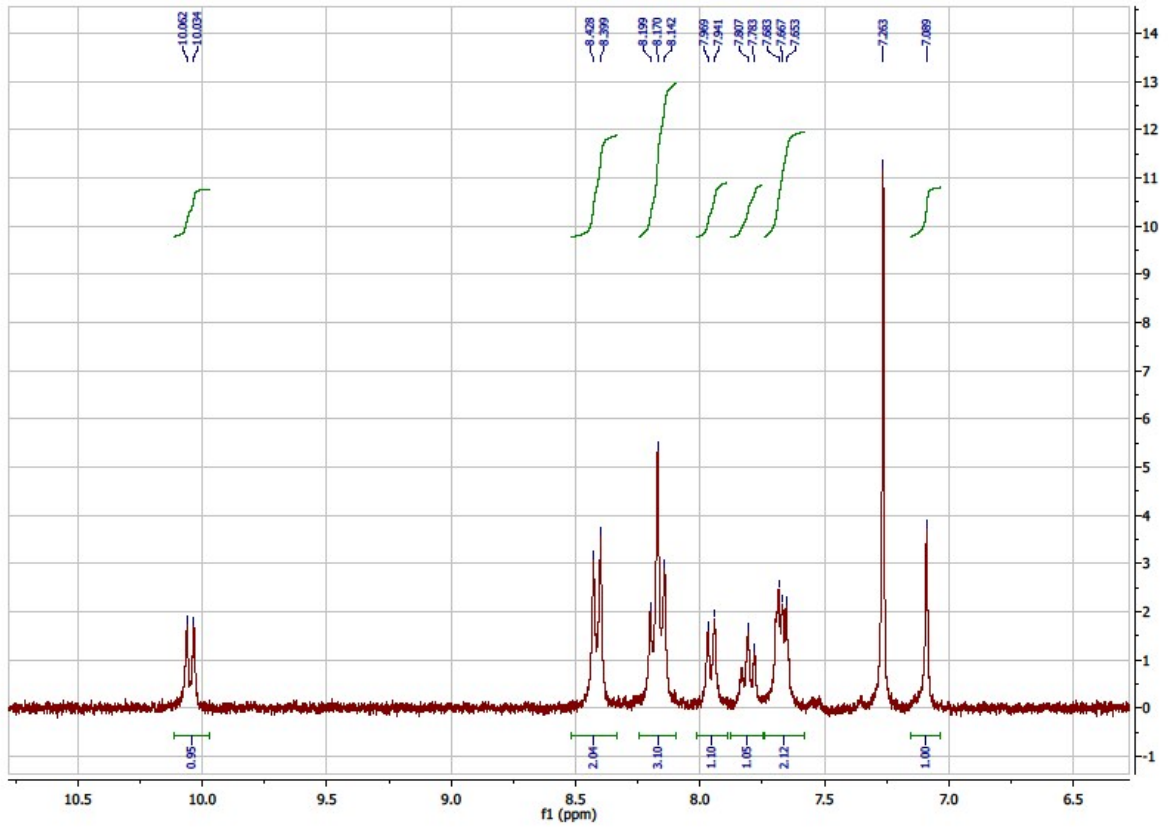

$^{13}\text{C}$  NMR OF B-23

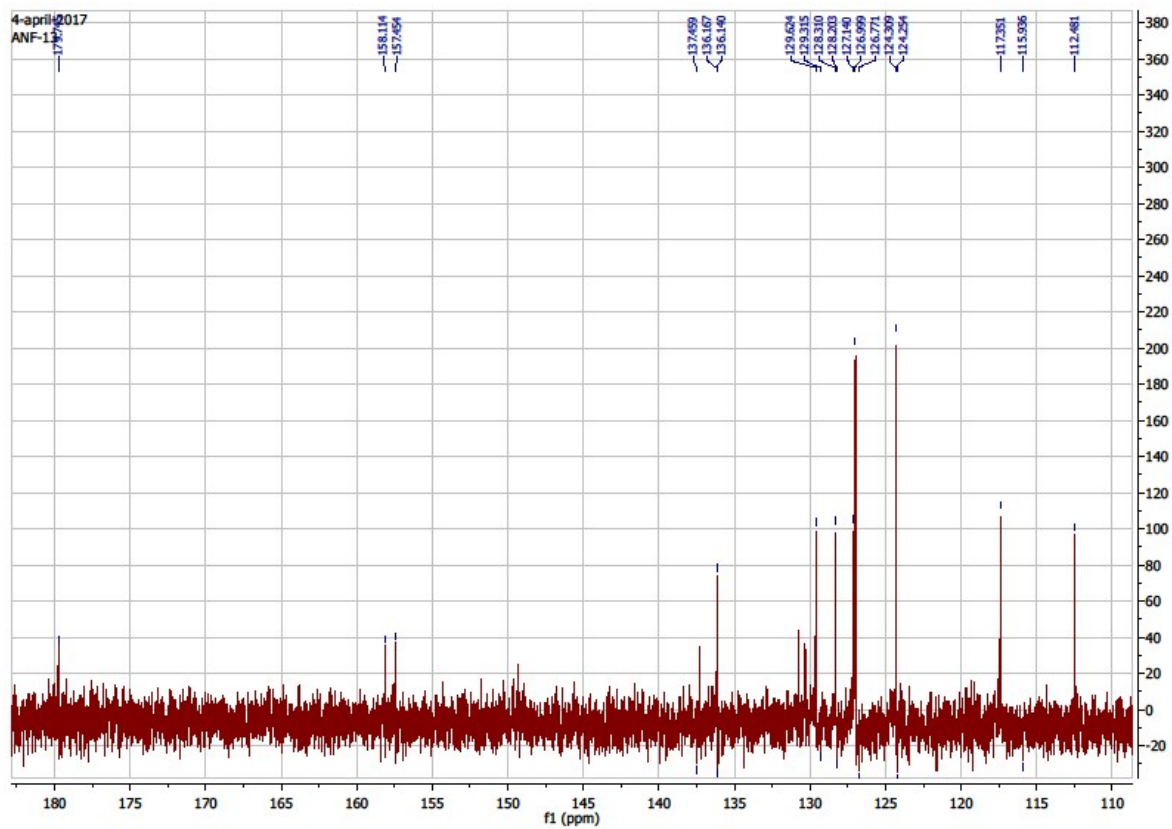

Supplement: MD-009-C7MD00565B-s001.pdf [file MD-009-C7MD00565B-s001.pdf]
